# Supplementary material
Source: PubMed Central journal article supplement (PMC2818956)
Supplement: 0911811107_pnas.200911811SI.pdf [file 0911811107_pnas.200911811SI.pdf]

# Supporting Information

Olsen et al. 10.1073/pnas.0911811107

## SI Materials and Methods

**Bacterial Strains and Construction of Isogenic MTSR Deletion Mutant and Complemented Strains.** Strain MGAS315 (ATCC-BAA595) was cultured from a patient with streptococcal toxic shock syndrome. Strain MGAS9887, a clinical isolate with a naturally occurring truncation mutation in the *mtsR* gene, was collected in accordance with a protocol approved by the Institutional Review Board, Human Subjects Review Committee of the University of Toronto. The genome sequence of strain MGAS315 has been reported, and strain MGAS9887 has been characterized by comparative genome sequencing (1–3). Based on extensive phylogenetic analysis of ~350 serotype M3 GAS isolates collected during our ongoing prospective population-based molecular epidemiology study of invasive infections in Ontario that includes whole genome sequencing, genome resequencing of 95 serotype M3 strains, phage typing, and whole genome SNP typing, strains MGAS9887 and MGAS315 have been determined to be genetically representative of clinical isolates with the mutant and wild-type *mtsR* allele, respectively (1–3). That is, strains MGAS9887 and MGAS315 possess all genetic traits common to the isolates in their respective branches of the GAS phylogenetic tree. Isogenic mutant strain MGAS315 $\Delta$ *mtsR* was generated from wild-type strain MGAS315 by deleting the *mtsR* gene, using a gene replacement method described previously (4). Briefly, the upstream and downstream flanking fragments of *mtsR* were amplified by PCR using primers *mtsRF1P1* and *mtsRF1P2* plus *mtsRF2P1* and *mtsRF2P2*. The gene fragments were cloned into pGRV and introduced into strain MGAS315 by electroporation to yield strain MGAS315 $\Delta$ *mtsR*. Complementation of the isogenic mutant strain was accomplished by introducing a wild-type *mtsR* gene into the MGAS315 $\Delta$ *mtsR* background using a standard protocol (5). The complete *mtsR* gene plus ~250 bp upstream and downstream were amplified from strain MGAS315 using primers *mtsRcomp-F* and *mtsRcomp-R*, and ligated into pCR2.1 using TOPO cloning (Invitrogen). The resulting plasmid was digested with *KpnI/NsiI* (New England Biolabs), and the *mtsR* gene segment was cloned into pDC123 (6) and introduced into MGAS315 $\Delta$ *mtsR* by electroporation to yield strain MGAS315 $\Delta$ *mtsRcomp*. The naturally occurring *mtsR* mutant strain MGAS9887 was also complemented using this plasmid. PCR and DNA sequencing analysis showed that the correct strain constructs had been generated (Fig. S1). Southern blot analysis was performed using a probe generated with primers *mtsR-seqFO* and *mtsR-seqRI*. All oligonucleotide sequences are listed in Table S2, and the cloning strategy is described in Fig. S1.

**Mouse Infection.** GAS inocula were prepared by diluting freezer stocks in PBS to 10<sup>7</sup> cfu/mL. Immediately before inoculation, the mice were weighed and anesthetized with isoflurane (Abbott Laboratories). Five- to 6-week-old (20–25 g) outbred immunocompetent female CD1 mice (Harlan Laboratories) were used for all experiments, and they were maintained on standard laboratory food and water ad libitum. The animals were randomly assigned to treatment groups and inoculated intramuscularly in the right hindlimb with 10<sup>6</sup> cfu of GAS in 100  $\mu$ L PBS. Several strains were studied, including MGAS315, MGAS315 $\Delta$ *mtsR*, MGAS315 $\Delta$ *mtsRcomp*, and strain MGAS9887 ( $n = 15$  animals per treatment group). Control animals were injected with PBS only. Near mortality was determined by observation every 3 h for the first 72 h, and then every 6–12 h thereafter. Mice were euthanized with isoflurane when they reached near mortality. For the quantitative culture experiment, mice were in-

oculated with PBS, wild-type strain MGAS315, or mutant strain MGAS315 $\Delta$ *mtsR* ( $n = 66$  animals per treatment group) and monitored every 3–6 h. The time point for the first quantitative cultures (12 h postinoculation) was selected based on observations from pilot survival experiments. The second (40 h postinoculation) and third (60 h postinoculation) time points were selected to coincide with observed near-mortality events in mice inoculated with wild-type strain MGAS315. At each time point, 22 mice per group were anesthetized, weighed, and bled via cardiac puncture. Blood was collected in 1-mL tubes containing sodium EDTA (Becton Dickinson). Mice were subsequently euthanized with isoflurane. Infected hindlimbs were surgically disarticulated and placed into preweighed tubes containing 1.5 mL of sterile PBS. The infected hindlimbs of 20 mice per group were used for quantitative culture at each time point, and two mice per group at each time point were used for correlative gross and microscopic analysis. After collection, all tissues were weighed and stored on wet ice until processed. For the myeloperoxidase assays, mice were inoculated with strain MGAS315, strain MGAS315 $\Delta$ *mtsR*, or PBS ( $n = 9$  animals per treatment group) and monitored every 6 h for near mortality. Three animals were killed at each time point as described. All mouse experimental protocols were approved by the Institutional Animal Care and Use Committee of the Methodist Hospital Research Institute.

**Gross and Microscopic Pathological Analyses.** Infected disarticulated mouse limbs were visually examined at 0, 6, 12, 24, 40, 48, 60, 72, and 96 h postinoculation, and representative specimens were photographed. Each limb was photographed from multiple angles to fully document all gross pathology findings. The image showing the muscle pathology characteristic of each strain was selected for publication (Figs. 1 and 5 and Fig. S5). Tissue was fixed in 10% phosphate-buffered formalin, decalcified, serially sectioned, and embedded in paraffin using automated standard instruments. Hematoxylin- and eosin-stained and Gram's-stained sections were examined with an Olympus BX5 microscope and photographed with an Olympus DP70 camera. The micrograph of tissue taken from the inoculation site that showed muscle pathology characteristic of each strain was selected for publication (Figs. 1 and 5 and Fig. S5).

**Quantitative Bacterial Culture from Infected Mouse Tissue.** Limbs from the infected mice were homogenized with an OMNI homogenizer (USA Scientific Inc.). Tissue homogenates and anticoagulated blood were diluted serially in sterile PBS and plated on TSA-B. The plates were incubated for 24 h at 37°C in an atmosphere of 5% CO<sub>2</sub> and 20% O<sub>2</sub>, and cfu's per gram tissue or per milliliter blood were calculated. The results of each treatment group at each time point were expressed as mean  $\pm$  SEM, and statistical significance was calculated by the Wilcoxon matched pairs test (Prism 4.03; GraphPad Software Inc.). Non-parametric statistical methods were used because the data did not fit a Gaussian distribution.

**Myeloperoxidase Activity Assay.** MPO as a surrogate marker for PMNs and associated tissue-destructive enzymes was quantified using the Mouse Myeloperoxidase Assay Kit (Hycult Biosystems) according to the manufacturer's instructions. Briefly, the infected limbs were homogenized, diluted 1:100 in PBS, and transferred to 96-well ELISA plates. Immunoreactive MPO enzyme was measured in each tissue by extrapolation from a standard curve.

The data were expressed as mean  $\pm$  SD micrograms MPO per tissue), and statistical significance was calculated with Student's *t* test (Prism 4.03; GraphPad Software Inc.).

**Isolation of Human PMNs.** Human PMNs were isolated from venous blood of healthy individuals as described (7). All studies were performed in accordance with a protocol approved by the Institutional Review Board for Human Subjects, National Institute of Allergy and Infectious Diseases. Purified PMNs were suspended in RPMI 1640 (Invitrogen) medium buffered with 10 mM Hepes (pH 7.2; RPMI/H) and chilled on ice until used.

**Bactericidal Activity Assays.** Killing of GAS by human PMNs was determined as described previously with slight modification (8). PMNs ( $10^6$ ) were combined with  $10^7$  unopsonized GAS in 96-well tissue culture plates on ice. Plates were centrifuged at  $380 \times g$  for 5 min and then incubated at  $37^\circ\text{C}$  for 30 or 60 min. Neutrophils were lysed with 0.1% saponin for 15 min on ice, and GAS were plated on Todd-Hewitt agar containing 0.2% yeast extract. Colonies were enumerated the following day, and percent GAS survival was calculated as  $(\text{CFU}_{\text{PMN}+}/\text{CFU}_{\text{PMN}-}) \times 100$ . The assay measures total number of viable ingested and uningested bacteria.

To test for differential susceptibility of MGAS315 and MGAS315 $\Delta$ *mtsR* to  $\text{H}_2\text{O}_2$ , strains ( $1-2 \times 10^8$ ) were cultured to exponential (2.5 h,  $\text{OD}_{600} = 0.350$ ) or stationary (7.5–8 h,  $\text{OD}_{600} = \sim 1.0$ ) phases of growth, transferred to 1.5-mL tubes, and rotated at  $37^\circ\text{C}$  with varied concentrations of  $\text{H}_2\text{O}_2$  for 60 min. Bacteria were plated on THY agar, and colonies were enumerated the following day. Percent GAS survival was determined using the equation  $(\text{CFU}_{+\text{hydrogen peroxide}}/\text{CFU}_{\text{control}}) \times 100$ .

**In Vitro Expression Microarray Analysis.** Expression microarray analysis was performed on strain MGAS315 and MGAS315 $\Delta$ *mtsR* by procedures described previously (9). Briefly, bacteria were grown in triplicate in THY medium and harvested during the exponential growth phase and at the transition from exponential to stationary phase. Transcripts were analyzed using a custom Affymetrix chip (10).

**TaqMan Analysis.** TaqMan real-time quantitative reverse transcription PCR (QRT-PCR) was performed in quadruplicate with an ABI Thermocycler 7700 using the  $\Delta\text{C}_T$  method of analysis (Applied Biosystems). Strains were grown to mid- and late-logarithmic growth phases in THY. RNA was isolated with a FastPrep Blue Kit (MP Biochemicals) and purified using QiaShredder and RNeasy kits (Qiagen). The concentration and quality of RNA were assessed with an Agilent 2100 Bioanalyzer and analysis of the A260/A280 ratio. cDNA was created from the RNA using SuperScript III (Invitrogen) according to the manufacturer's instructions. TaqMan primers and probes for *mtsR*, *prsA*, *speB*, and the internal control gene *gyrA* are listed in Table S2.

**Extracellular Caseinolytic Activity.** GAS secreted protease activity was assessed by milk-plate hydrolysis, an assay specific for SpeB activity (11, 12). Briefly, 18-h GAS cultures grown in THY media were inoculated into THY-based plates composed of 2.5% nonfat milk (BioRad) and 1.25% agarose (Difco) using a 22-gauge hollow needle. The plates were incubated anaerobically for 48 h. The average diameter of proteolytic activity was determined by measuring the diameter of clearing around colonies using calipers. The data were expressed as mean diameter  $\pm$  SD (mm milk clearing), and statistical significance was calculated with Student's *t* test (Prism 4.03; GraphPad Software Inc.).

**In Vivo SpeB Protease Activity.** SpeB protease activity was assessed by zymogen cleavage, an assay specific for SpeB activity (13).

Briefly, infected monkey muscle was homogenized, clarified by centrifugation, sterile filtered, and incubated at  $37^\circ\text{C}$  for 12 h in the presence of purified recombinant Cys192Ser SpeB zymogen. This mutant SpeB zymogen (40 kDa) lacks enzymatic activity, so it is unable to autocatalytically process itself into the mature enzyme (28 kDa); however, in the presence of enzymatically active SpeB, it can be fully processed. Reaction products were resolved by SDS/PAGE and immunostained with either a polyclonal anti-SpeB or monoclonal anti-HIS6 $\times$  antibody (Invitrogen). Detection of the 28-kDa band following incubation of the inactive zymogen with the infected muscle homogenate confirms the presence of enzymatically active SpeB in the tissue specimen. SpeB harvested from the culture supernatant of serotype M1 strain MGAS2221 was used as a positive control, and PBS sham infected monkey muscle was used as a negative control.

**Monkey Infection.** The study protocol was approved by the Animal Care and Use Committee at the University of Houston. Adult male cynomolgus macaques (*Macaca fascicularis*) (Charles River BRF) ages 3–5 years were used for all experiments. All animals were housed individually and provided food and water ad libitum. Inocula of wild-type strain MGAS315 and isogenic mutant strain MGAS315 $\Delta$ *mtsR* were prepared as described previously. Differences in animal weight and age were minimized during assignment to experimental groups. In the first experiment, four animals each received the wild-type strain, *mtsR* mutant strain, or PBS sham inoculation. In the second experiment, three animals each received the wild-type strain, *prsA*-overexpressing strain, or *speB* inactivated strain. For experimental infections, each animal was inoculated with  $1.0 \times 10^8$  cfu/kg in 500  $\mu\text{L}$  PBS. Each animal was anesthetized (see next section), outfitted with a nylon mesh jacket overlying a transdermal fentanyl patch, and inoculated intramuscularly in the anterior thigh to a uniform depth. The animals were observed continuously and killed when they were judged to be near death.

**Monkey Anesthesia and Sedation.** The animals were sedated with tiletamine HCl and zolazepam HCl (Fort Dodge Animal Health) at a dose of 2 mg/kg intramuscularly. They were clipped with a no. 40 blade over the thorax, and a 25  $\mu\text{g}/\text{h}$  fentanyl patch was sutured in place over the shaved area (Sandoz). A mesh jacket (Lomir Biomedical, Inc.) was fitted to each monkey to protect the fentanyl patch. All animals were acclimatized to the jackets 2 weeks before the start of the study. Each animal was inoculated intramuscularly in the anterior thigh at a uniform depth. Subsequent sedations were done with either a combination of tiletamine HCl and zolazepam HCl (Telazol; Fort Dodge Animal Health) at a dose of 2 mg/kg intramuscularly or ketamine HCl (Vedco) at a dose of 7–15 mg/kg intramuscularly. Animals were observed continuously for the first 48 h and every 2 h for the next 24 h. Animals were euthanized in matched pairs when they were determined to be moribund.

**Creatine Kinase Assays.** The level of creatine kinase in serum obtained from monkeys at sacrifice was measured by automated enzymatic analysis using a coupled Oliver–Rosalki method on a Beckman CX7 analyzer (Equine Laboratories).

**Determination of Monkey Muscle Lesion Area.** Lesion size in the infected monkeys was determined immediately following sacrifice. The margin of viable/nonviable muscle was identified by visual inspection of overt necrosis, abscess formation, dusky discoloration, erythema, and edema. The diameter of the lesion in the greatest dimension (major axis) and its two perpendicular line segments (minor axes) were measured with a caliper and applied to the formula for calculating the volume of a scalene ellipse.



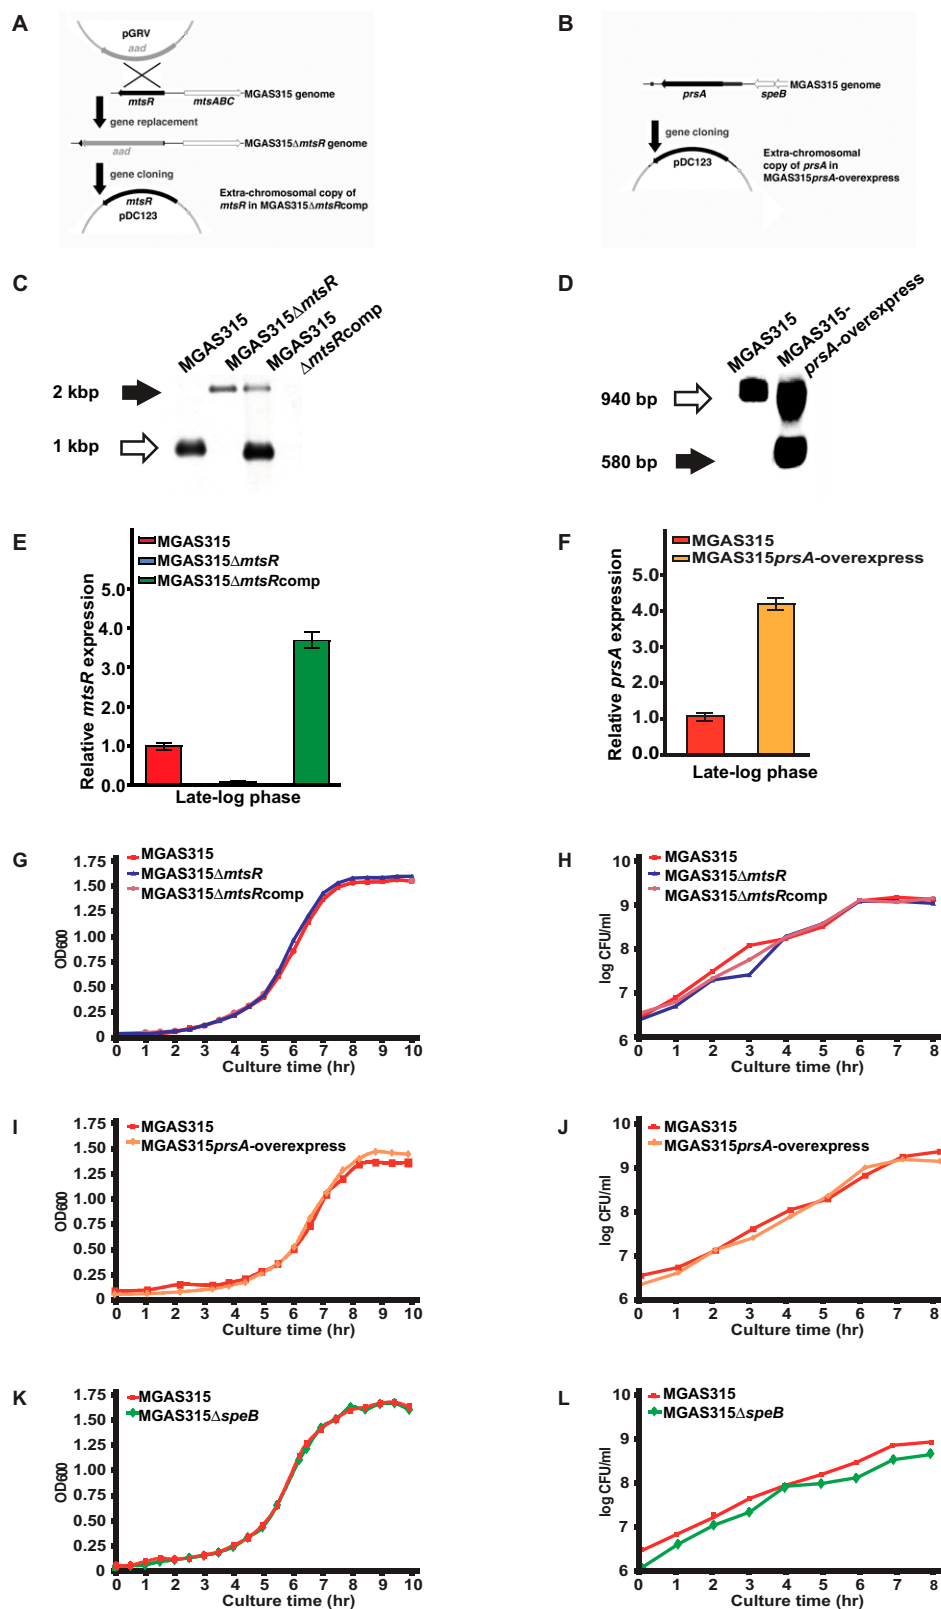

**Fig. S1.** Construction and confirmation of isogenic strains MGAS315Δ*mtsR*, MAS315Δ*mtsR*comp, MGAS315*prsA*-overexpress, and MGAS315Δ*speB*. (A) Molecular genetic strategy for inactivating *mtsR* in strain MGAS315. The *mtsR* gene in strain MGAS315 was replaced with the *aad* gene conferring spectinomycin resistance to generate the isogenic mutant strain MGAS315Δ*mtsR*. Strain MGAS315Δ*mtsR* was complemented with an extrachromosomal copy of *mtsR* cloned into pDC123 to generate strain MGAS315Δ*mtsR*comp. (B) Strain MGAS315*prsA*-overexpress was generated by providing MGAS315 with an extrachromosomal copy of *prsA* cloned into pDC123. All primers and probes are listed in Table S2. (C) Southern blot showing the intact *mtsR* gene (white arrow) in wild-type strain MGAS315 and the deleted *mtsR* gene (black arrow) in mutant strain MGAS315Δ*mtsR*. Strain MGAS315Δ*mtsR*comp has both the deleted genomic copy of the *mtsR* gene (black arrow) and the complemented extrachromosomal *mtsR* gene (white arrow). (D) Southern blot showing the intact *prsA* gene (white arrow) in wild-type strain MGAS315 and the deleted *prsA* gene (black arrow) in mutant strain MGAS315Δ*prsA*. Strain MGAS315Δ*prsA*-overexpress has both the deleted genomic copy of the *prsA* gene (black arrow) and the complemented extrachromosomal *prsA* gene (white arrow).

strain MGAS315. Strain MGAS315*prsA*-overexpress has both the genomic copy of the *prsA* gene (white arrow) and the extrachromosomal *prsA* gene (black arrow). (E) TaqMan quantitative PCR confirmed that compared with wild-type strain MGAS315, the isogenic mutant strain MGAS315 $\Delta$ *mtsR* does not express *mtsR* transcript. Genetic complementation to create strain MGAS315 $\Delta$ *mtsR*comp restores *mtsR* expression. (F) TaqMan quantitative PCR confirmed that compared with wild-type strain MGAS315, strain MGAS315*prsA*-overexpress overexpresses *prsA* transcript. (G) Growth curves of wild-type (MGAS315), *mtsR* isogenic mutant (MGAS315 $\Delta$ *mtsR*), and complemented mutant (MGAS315 $\Delta$ *mtsR*comp) GAS strains grown in THY. OD<sub>600</sub> readings were taken at indicated times for growth in THY medium. (H) Growth curves strains MGAS315, MGAS315 $\Delta$ *mtsR*, and MGAS315 $\Delta$ *mtsR*comp with quantitative cfu's performed. (I) Growth curves of wild-type (MGAS315) and *prsA*-overexpressing (MGAS315*prsA*-overexpress) GAS strains. (J) Growth curves of MGAS315 and MGAS315*prsA*-overexpress with quantitative cfu's performed. (K) Growth curves of wild-type (MGAS315) and *speB* isogenic mutant (MGAS315 $\Delta$ *speB*) GAS strains. (L) Growth curves of strains MGAS315 and MGAS315 $\Delta$ *speB* with quantitative cfu's performed. Inactivation of *mtsR*, overexpression of *prsA*, or inactivation of *speB* had no significant effect on GAS growth in vitro in nutrient rich media.

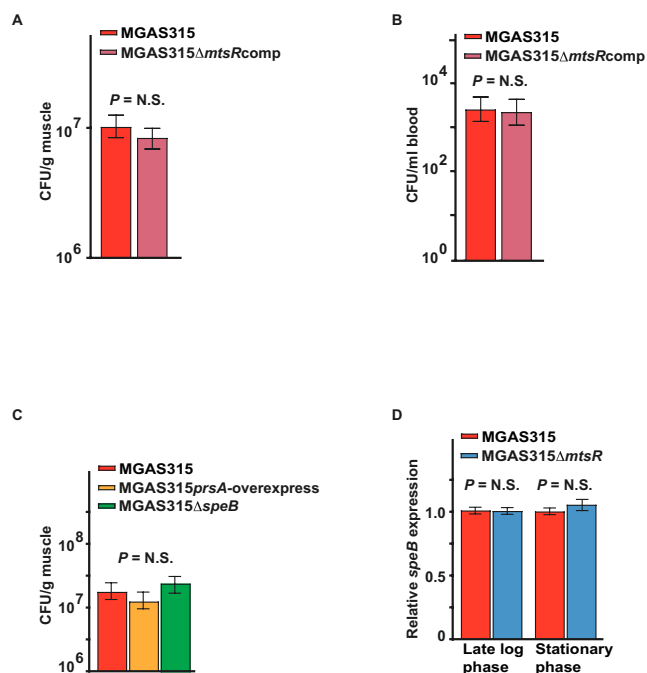

**Fig. S2.** (A) Quantitative culture of muscle from mice infected with wild-type strain MGAS315 or gene complemented mutant strain MGAS315 $\Delta$ *mtsR*comp. (B) Quantitative culture of blood from mice infected with strains MGAS315 or MGAS315 $\Delta$ *mtsR*comp. (C) Quantitative culture of muscle from mice infected with wild-type strain MGAS315 or isogenic mutant strains MGAS315*prsA*-overexpress and MGAS315 $\Delta$ *speB*. (D) TaqMan analysis of *speB* transcript level in strain MGAS315 or MGAS315 $\Delta$ *mtsR*.

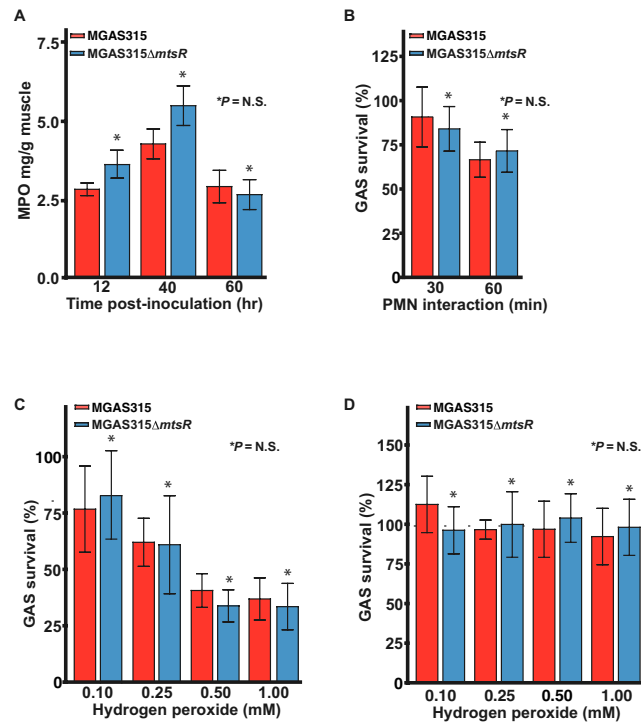

**Fig. S3.** Inactivation of *mtsR* has no significant effect on GAS recruitment of host PMNs or survival after human PMN phagocytosis and exposure to hydrogen peroxide. (A) Level of immunoreactive myeloperoxidase (MPO) in limb tissue homogenates. Mice were inoculated intramuscularly in the hindlimb with wild-type strain MGAS315 or isogenic mutant strain MGAS315Δ*mtsR* ( $n = 9$  animals per treatment group). The mice were killed at each time point, infected limbs were homogenized, and MPO levels in the homogenates were determined using a commercially available antigen-capture assay. There was no significant difference in immunoreactive MPO present in the mouse groups at any of the time points. (B) PMN bactericidal activity. Human PMNs were cultured with MGAS315 or MGAS315Δ*mtsR* for the indicated times, and killing of bacteria was determined. There was no significant difference in survival at either time point. (C and D) Killing of GAS by H<sub>2</sub>O<sub>2</sub>. GAS were cultured to midexponential (C) or stationary phase (D) of growth and incubated for 60 min with H<sub>2</sub>O<sub>2</sub>.

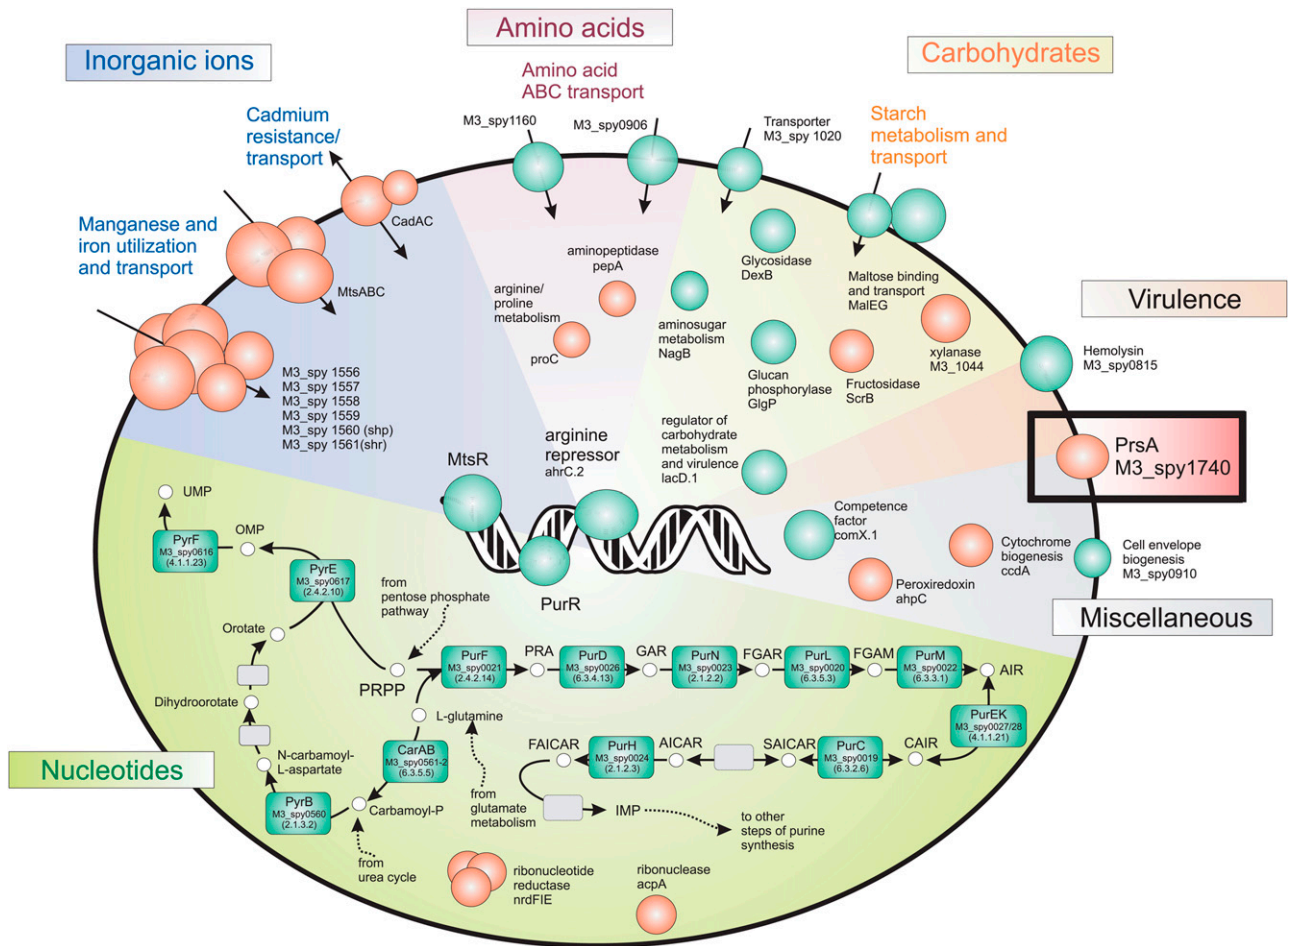

**Fig. S4.** Schematic summarizing significant differences in gene transcript level between wild-type strain MGAS315 and isogenic mutant strain MGAS315 $\Delta$ *mtsR*. Red circles and rectangles denote transcripts significantly increased in the mutant strain relative to the wild-type strain, whereas green circles and rectangles represent transcripts that are significantly decreased in the mutant strain. The up-regulated *prsA* transcript is identified by the rectangle on the right side of the figure. Gene numbers refer to gene annotations (Table S1).

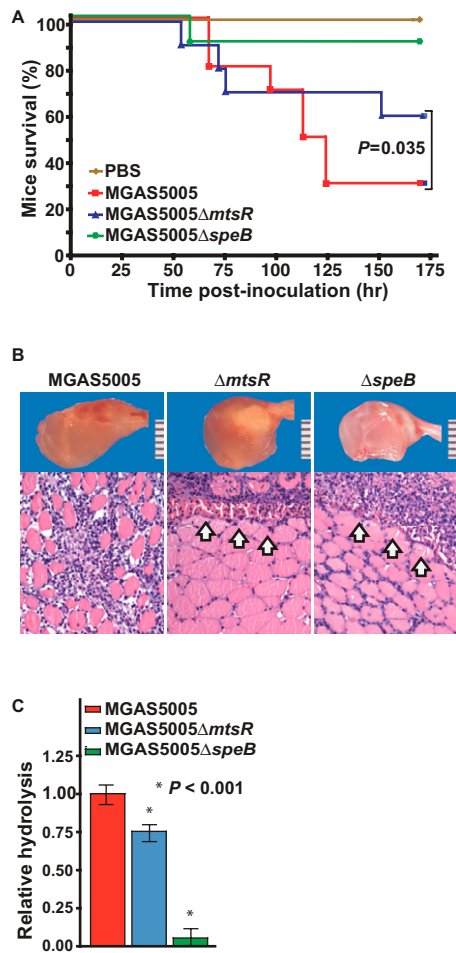

**Fig. S5.** (A) Kaplan–Meier survival curves for mice inoculated intramuscularly with a panel of isogenic serotype M1 strain GAS organisms MGAS5005, MGAS5005 $\Delta$ *mtsR*, or MGAS5005 $\Delta$ *speB*. (B) Visual and microscopic examination of mice inoculated intramuscularly with isogenic serotype M1 strain GAS organisms. Wild-type strain MGAS5005 caused diffuse soft tissue necrosis, whereas strains MGAS5005 $\Delta$ *mtsR* and MGAS5005 $\Delta$ *speB* caused significantly less necrotic lesions that were confined to the inoculation site (arrows). These pathologic features are similar to those observed in mice inoculated with the serotype M3 strains (see Fig. 1). (C) Milk agar assay for SpeB activity. Compared with the wild-type, strains MGAS5005 $\Delta$ *mtsR* and MGAS5005 $\Delta$ *speB* have significantly less proteolytic activity.



Table S1. Ratios of  $\Delta mtsR$ /wild type in exponential and transition from exponential to stationary phase

| SF370 ORF number | MGAS315 ORF | Gene   | Abundance in <i>mtsR</i> mutant (EXP) | Abundance in <i>mtsR</i> mutant (EXP/S) | Functional Category              | Functional Sub-category                | Putative function                                                                                |
|------------------|-------------|--------|---------------------------------------|-----------------------------------------|----------------------------------|----------------------------------------|--------------------------------------------------------------------------------------------------|
| Spy0112          | SpyM3_0088  | proC   |                                       | 1.72                                    | Metabolism                       | Amino acid transport and metabolism    | Pyrroline-5-carboxylate reductase                                                                |
| Spy0833          | SpyM3_0561  | carA   |                                       | 0.57                                    | Metabolism                       | Amino acid transport and metabolism    | Carbamoylphosphate synthase small subunit                                                        |
| Spy0835          | SpyM3_0562  | carB   |                                       | 0.55                                    | Metabolism                       | Amino acid transport and metabolism    | Carbamoylphosphate synthase large subunit (split gene in MJ)                                     |
| Spy1274          | SpyM3_0906  |        |                                       | 0.61                                    | Metabolism                       | Amino acid transport and metabolism    | ABC-type amino acid transport/signal transduction systems, periplasmic component/domain          |
| Spy1506          | SpyM3_1160  | -      |                                       | 0.59                                    | Metabolism                       | Amino acid transport and metabolism    | ABC-type polar amino acid transport system, ATPase component                                     |
| Spy1549          | SpyM3_1198  | ahrC.2 |                                       | 0.66                                    | Metabolism                       | Amino acid transport and metabolism    | Arginine repressor                                                                               |
| Spy0115          | SpyM3_0089  | pepA   | 1.59                                  | 1.76                                    | Metabolism                       | Carbohydrate transport and metabolism  | Cellulase M and related proteins                                                                 |
| Spy1291          | SpyM3_0980  | glgP   |                                       | 0.48                                    | Metabolism                       | Carbohydrate transport and metabolism  | Glucan phosphorylase                                                                             |
| Spy1294          | SpyM3_0983  | malE   |                                       | 0.51                                    | Metabolism                       | Carbohydrate transport and metabolism  | Maltose-binding periplasmic proteins/domains                                                     |
| Spy1296          | SpyM3_0985  | malG   |                                       | 0.46                                    | Metabolism                       | Carbohydrate transport and metabolism  | ABC-type maltose transport systems, permease component                                           |
| Spy1340          | SpyM3_1020  | -      | 0.62                                  | 0.48                                    | Metabolism                       | Carbohydrate transport and metabolism  | Permeases of the major facilitator superfamily                                                   |
| Spy1399          | SpyM3_1065  | nagB   |                                       | 0.61                                    | Metabolism                       | Carbohydrate transport and metabolism  | 6-phosphogluconolactonase/Glucosamine-6-phosphate isomerase/deaminase                            |
| Spy1704          | SpyM3_1482  | lacD.1 |                                       | 0.64                                    | Metabolism                       | Carbohydrate transport and metabolism  | Tagatose-1,6-bisphosphate aldolase                                                               |
| SPY1973          | SpyM3_1695  | dexB   |                                       | 0.65                                    | Metabolism                       | Carbohydrate transport and metabolism  | Glycosidases                                                                                     |
| Spy1370          | SpyM3_1044  | -      | 2.98                                  | 2.04                                    | Metabolism                       | Carbohydrate transport and metabolism  | Predicted xylanase/chitin deacetylase                                                            |
| Spy1816          | SpyM3_1570  | scrB   |                                       | 1.50                                    | Metabolism                       | Carbohydrate transport and metabolism  | Beta-fructosidases (levanase/invertase)                                                          |
| Spy1280          | SpyM3_0910  | glmS   | 0.65                                  | 0.57                                    | Cellular processes and signaling | Cell wall/membrane/envelope biogenesis | Glucosamine 6-phosphate synthetase, contains amidotransferase and phosphosugar isomerase domains |
| Spy0814          | SpyM3_0547  | folC.2 |                                       | 1.59                                    | Metabolism                       | Coenzyme transport and metabolism      | Folypolyglutamate synthase                                                                       |
| Spy1790          | SpyM3_1556  | -      |                                       | 1.78                                    | Cellular processes and signaling | Defense mechanisms                     | ABC-type multidrug transport system, ATPase and permease components                              |
| Spy0148          | SpyM3_0115  | ntpl   |                                       | 0.62                                    | Metabolism                       | Energy production and conversion       | Archaeal/vacuolar-type H <sup>+</sup> -ATPase subunit I                                          |
| Spy1128          | SpyM3_0787  | pta    |                                       | 0.64                                    | Metabolism                       | Energy production and conversion       | Phosphotransacetylase                                                                            |
| Spy1791          | SpyM3_1557  | -      | 1.79                                  | 4.00                                    | Metabolism                       | Energy production and conversion       | ABC-type transport system involved in cytochrome bd biosynthesis, ATPase and permease components |
| Spy1113          | SpyM3_0773  | -      |                                       | 0.54                                    | Hypothetical                     | General function predicted             | Acid phosphatase (class B)                                                                       |
| Spy1325          | SpyM3_1005  | -      |                                       | 0.58                                    | Hypothetical                     | General function predicted             | putative transcriptional antiterminator                                                          |
| Spy2162          | SpyM3_1818  | cadD   |                                       | 0.66                                    | Metabolism                       | Inorganic ion transport and metabolism | Predicted permease, cadmium resistance protein                                                   |
| Spy0453          | SpyM3_0318  | mtsA   | 2.72                                  |                                         | Metabolism                       | Inorganic ion transport and metabolism | ABC-type Mn/Zn transport system, periplasmic Mn/Zn-binding (lipo)protein (surface adhesin A)     |
| Spy0454          | SpyM3_0319  | mtsB   | 3.04                                  |                                         | Metabolism                       | Inorganic ion transport and metabolism | ABC-type Mn/Zn transport systems, ATPase component                                               |

Table S1. Cont.

|               |            |        |       |       |                        |                                        |                                                                                        |
|---------------|------------|--------|-------|-------|------------------------|----------------------------------------|----------------------------------------------------------------------------------------|
| Spy0456       | SpyM3_0320 | mtsC   | 3.08  |       | Metabolism             | Inorganic ion transport and metabolism | ABC-type Mn <sup>2+</sup> /Zn <sup>2+</sup> transport systems, permease components     |
| SPy1434       | SpyM3_1093 | cadA   | 2.63  | 2.87  | Metabolism             | Inorganic ion transport and metabolism | Cation transport ATPases                                                               |
| Spy1793       | SpyM3_1558 | -      | 2.43  | 4.87  | Metabolism             | Inorganic ion transport and metabolism | ABC-type cobalamin/Fe <sup>3+</sup> -siderophores transport systems, ATPase components |
| Spy1794       | SpyM3_1559 | -      | 2.08  | 4.87  | Metabolism             | Inorganic ion transport and metabolism | ABC-type Fe <sup>3+</sup> -siderophore transport system, permease component            |
| Spy1795       | SpyM3_1560 | shp    | 1.89  | 4.39  | Metabolism             | Inorganic ion transport and metabolism | ABC-type Fe <sup>3+</sup> -hydroxamate transport system, periplasmic component         |
| Spy1798       | SpyM3_1561 | shr    | 3.21  | 8.06  | Metabolism             | Inorganic ion transport and metabolism | Putative Fe <sup>3+</sup> -siderophore transport protein                               |
| Spy0140       | SpyM3_0108 |        |       | 0.62  | Metabolism             | Lipid transport and metabolism         | Acetyl-CoA acetyltransferase                                                           |
| SPY0025       | SpyM3_0020 | -      | 0.63  |       | Metabolism             | Nucleotide transport and metabolism    | Phosphoribosylformylglycinamide (FGAM) synthase, synthetase domain                     |
| Spy0026       | SpyM3_0021 | purF   |       | 0.54  | Metabolism             | Nucleotide transport and metabolism    | Glutamine phosphoribosylpyrophosphate amidotransferase                                 |
| not annotated | SpyM3_0024 | -      | 0.63  |       | Metabolism             | Nucleotide transport and metabolism    | AICAR transformylase/IMP cyclohydrolase PurH (only IMP cyclohydrolase domain in Afu)   |
| Spy0033       | SpyM3_0027 | purE   |       | 0.66  | Metabolism             | Nucleotide transport and metabolism    | Phosphoribosylcarboxyaminoimidazole (NCAIR) mutase                                     |
| Spy0425       | SpyM3_0301 | nrdF.1 | 18.61 | 5.49  | Metabolism             | Nucleotide transport and metabolism    | Ribonucleotide reductase beta subunit                                                  |
| Spy0426       | SpyM3_0302 | nrdI   | 27.07 | 10.10 | Metabolism             | Nucleotide transport and metabolism    | Protein involved in ribonucleotide reduction                                           |
| Spy0427       | SpyM3_0303 | nrdE.1 | 30.63 | 10.31 | Metabolism             | Nucleotide transport and metabolism    | Ribonucleotide reductase alpha subunit                                                 |
| Spy0831       | SpyM3_0559 | pyrP   |       | 0.56  | Metabolism             | Nucleotide transport and metabolism    | Xanthine/uracil permeases                                                              |
| Spy0832       | SpyM3_0560 | pyrB   |       | 0.55  | Metabolism             | Nucleotide transport and metabolism    | Aspartate carbamoyltransferase, catalytic chain                                        |
| Spy0872       | SpyM3_0591 | -      | 0.62  | 0.58  | Metabolism             | Nucleotide transport and metabolism    | 5'-nucleotidase/2',3'-cyclic phosphodiesterase and related esterases                   |
| Spy0900       | SpyM3_0616 | pyrF   |       | 0.38  | Metabolism             | Nucleotide transport and metabolism    | Orotidine-5'-phosphate decarboxylase                                                   |
| Spy0901       | SpyM3_0617 | pyrE   |       | 0.50  | Metabolism             | Nucleotide transport and metabolism    | Orotate phosphoribosyltransferase                                                      |
| Spy1163       | SpyM3_0794 | xpt    | 0.55  |       | Metabolism             | Nucleotide transport and metabolism    | Adenine/guanine phosphoribosyltransferases and related PRPP-binding proteins           |
| not present   | SpyM3_0686 |        |       | 1.75  | Mobile genetic element | Phage                                  | Transcriptional regulator                                                              |
| not present   | SpyM3_0690 |        |       | 1.98  | Mobile genetic element | Phage                                  | Replicative DNA helicase                                                               |
| not present   | SpyM3_0692 |        |       | 1.79  | Mobile genetic element | Phage                                  | Archaeal/vacuolar-type H <sup>+</sup> -ATPase subunit A                                |
| not annotated | SpyM3_0694 |        |       | 1.64  | Mobile genetic element | Phage                                  |                                                                                        |
| not present   | SpyM3_0696 |        |       | 1.94  | Mobile genetic element | phage                                  |                                                                                        |
| not present   | SpyM3_0701 |        | 2.43  |       | Mobile genetic element | Phage                                  | Transcriptional regulator                                                              |
| not present   | SpyM3_0732 |        |       | 0.49  | Mobile genetic element | phage                                  |                                                                                        |
| not present   | SpyM3_0734 |        |       | 0.57  | Mobile genetic element | Phage                                  |                                                                                        |
| not present   | SpyM3_0736 |        | 0.60  | 0.50  | Mobile genetic element | Phage                                  | Predicted transcriptional regulators                                                   |
| SPY0701       | SpyM3_0928 |        |       | 1.87  | Mobile genetic element | Phage                                  |                                                                                        |
| not present   | SpyM3_0952 |        | 1.92  |       | Mobile genetic element | Phage                                  |                                                                                        |
| not present   | SpyM3_0953 |        | 1.81  |       | Mobile genetic element | Phage                                  | SAM-dependent methyltransferases                                                       |
| not present   | SpyM3_0956 |        | 1.84  |       | Mobile genetic element | Phage                                  |                                                                                        |

Table S1. Cont.

|             |            |       |      |      |                        |       |                                               |
|-------------|------------|-------|------|------|------------------------|-------|-----------------------------------------------|
| not present | SpyM3_0959 |       | 1.68 |      | Mobile genetic element | Phage |                                               |
| not present | SpyM3_0961 |       | 1.53 |      | Mobile genetic element | Phage | Phage DNA/RNA helicase (DEAD/DEAH box family) |
| not present | SpyM3_0962 |       | 1.81 |      | Mobile genetic element | Phage |                                               |
| not present | SpyM3_0964 |       | 1.70 |      | Mobile genetic element | Phage | Predicted transcriptional regulators          |
| not present | SpyM3_0965 |       | 2.14 |      | Mobile genetic element | Phage |                                               |
| not present | SpyM3_0966 |       | 2.31 |      | Mobile genetic element | Phage |                                               |
| not present | SpyM3_0968 |       |      | 0.40 | Mobile genetic element | Phage |                                               |
| not present | SpyM3_0969 |       |      | 0.43 | Mobile genetic element | Phage |                                               |
| not present | SpyM3_0970 |       | 2.66 |      | Mobile genetic element | Phage |                                               |
| not present | SpyM3_0971 |       | 1.67 |      | Mobile genetic element | Phage | Predicted transcriptional regulators          |
| not present | SpyM3_0978 | int.1 |      | 0.55 | Mobile genetic element | Phage | Integrase                                     |
| Spy0681     | SpyM3_1231 |       |      | 3.20 | Mobile genetic element | Phage |                                               |
| not present | SpyM3_1235 |       |      | 2.87 | Mobile genetic element | Phage |                                               |
| not present | SpyM3_1246 |       |      | 1.54 | Mobile genetic element | Phage |                                               |
| not present | SpyM3_1259 |       |      | 0.56 | Mobile genetic element | Phage |                                               |
| Spy0977     | SpyM3_1324 |       |      | 1.94 | Mobile genetic element | Phage |                                               |
|             | SpyM3_1354 |       |      | 0.59 | Mobile genetic element | phage |                                               |
| not present | SpyM3_1420 |       |      | 1.79 | Mobile genetic element | phage |                                               |
| not present | SpyM3_1422 |       |      | 1.49 | Mobile genetic element | phage |                                               |
| not present | SpyM3_1423 |       |      | 1.58 | Mobile genetic element | phage |                                               |
| not present | SpyM3_1424 |       |      | 1.84 | Mobile genetic element | phage |                                               |
| not present | SpyM3_1425 |       |      | 1.62 | Mobile genetic element | phage |                                               |
| not present | SpyM3_1426 |       |      | 1.99 | Mobile genetic element | phage |                                               |
| not present | SpyM3_1427 |       |      | 1.74 | Mobile genetic element | phage |                                               |
| not present | SpyM3_1428 | -     | 1.65 | 1.77 | Mobile genetic element | Phage |                                               |
| not present | SpyM3_1429 |       |      | 1.78 | Mobile genetic element | phage |                                               |
| not present | SpyM3_1430 |       |      | 2.00 | Mobile genetic element | phage |                                               |
| Spy0685     | SpyM3_1431 |       |      | 1.88 | Mobile genetic element | Phage |                                               |
| not present | SpyM3_1435 |       |      | 1.62 | Mobile genetic element | phage |                                               |
| not present | SpyM3_1437 | -     |      | 1.54 | Mobile genetic element | Phage |                                               |
| not present | SpyM3_1438 |       |      | 1.46 | Mobile genetic element | Phage |                                               |
| not present | SpyM3_1446 | -     | 1.84 | 1.66 | Mobile genetic element | Phage |                                               |
| not present | SpyM3_1450 |       | 1.92 | 1.70 | Mobile genetic element | Phage |                                               |

Table S1. Cont.

|                             |               |         |      |      |                                    |                                                              |                                                                                                     |
|-----------------------------|---------------|---------|------|------|------------------------------------|--------------------------------------------------------------|-----------------------------------------------------------------------------------------------------|
| not present                 | SpyM3_1453    |         | 1.50 |      | Mobile genetic element             | Phage                                                        |                                                                                                     |
| not annotated (SpyM18_1620) | not annotated |         |      | 0.63 | Hypothetical                       | Poorly characterized                                         |                                                                                                     |
| Spy0116                     | not annotated |         |      | 4.69 | Hypothetical                       | Poorly characterized                                         |                                                                                                     |
| Spy0100                     | SpyM3_0077    | -       |      | 0.61 | Hypothetical                       | Poorly characterized                                         | putative DNA binding protein                                                                        |
| Spy0205                     | SpyM3_0150    | -       |      | 0.57 | Hypothetical                       | Poorly characterized                                         |                                                                                                     |
| Spy0470                     | SpyM3_0332    | -       |      | 1.59 | Hypothetical                       | Poorly characterized                                         | Myosin-crossreactive antigen                                                                        |
| Spy0519                     | SpyM3_0367    | -       |      | 0.64 | Hypothetical                       | Poorly characterized                                         | ABC-type uncharacterized transport system, permease component                                       |
| Spy0617                     | SpyM3_0436    |         |      | 1.53 | Hypothetical                       | Poorly characterized                                         | Predicted hydrolases of the HAD superfamily                                                         |
| Spy0843                     | SpyM3_0569    | -       | 1.96 | 1.92 | Hypothetical                       | Poorly characterized                                         | Predicted flavin-nucleotide-binding protein structurally related to pyridoxine 5'-phosphate oxidase |
| Spy0844                     | SpyM3_0570    | -       | 1.89 | 1.90 | Hypothetical                       | Poorly characterized                                         | Predicted flavin-nucleotide-binding protein structurally related to pyridoxine 5'-phosphate oxidase |
| Spy0914                     | SpyM3_0629    |         |      | 0.61 | Hypothetical                       | Poorly characterized                                         |                                                                                                     |
| Spy0915                     | SpyM3_0630    |         |      | 0.65 | Hypothetical                       | Poorly characterized                                         | Predicted sulfurtransferase                                                                         |
| not annotated               | SpyM3_1092    | -       | 1.73 | 1.76 | Hypothetical                       | Poorly characterized                                         |                                                                                                     |
| Spy1581                     | SpyM3_1282    | -       |      | 1.51 | Hypothetical                       | Poorly characterized                                         | Uncharacterized conserved protein, contains double-stranded beta-helix domain                       |
| Spy1607                     | SpyM3_1355    |         |      | 0.64 | Hypothetical                       | Poorly characterized                                         |                                                                                                     |
| Spy1691                     | SpyM3_1473    | -       |      | 0.65 | Hypothetical                       | Poorly characterized                                         |                                                                                                     |
| Spy1736                     | SpyM3_1509    | -       |      | 0.59 | Hypothetical                       | Poorly characterized                                         | Permeases                                                                                           |
| SPY0219                     | SpyM3_1705    |         | 0.21 |      | Hypothetical                       | Poorly characterized                                         | Protein involved in ribonucleotide reduction                                                        |
| Spy2107                     | SpyM3_1793    | -       |      | 0.57 | Hypothetical                       | Poorly characterized                                         | Predicted dehydrogenases and related proteins                                                       |
| Spy2173                     | SpyM3_1829    |         |      | 1.82 | Hypothetical                       | Poorly characterized                                         | Predicted membrane protein                                                                          |
| Spy2174                     | SpyM3_1830    |         |      | 2.41 | Hypothetical                       | Poorly characterized                                         |                                                                                                     |
| Spy0379                     | SpyM3_0277    | pflC    |      | 0.65 | Cellular processes and signaling   | Posttranslational modification, protein turnover, chaperones | Pyruvate-formate lyase-activating enzyme                                                            |
| Spy0888                     | SpyM3_0607    | clpL    |      | 0.50 | Cellular processes and signaling   | Posttranslational modification, protein turnover, chaperones | ATPases with chaperone activity, ATP-binding subunit                                                |
| Spy0917                     | SpyM3_0631    | -       | 0.44 |      | Cellular processes and signaling   | Posttranslational modification, protein turnover, chaperones | Glutathione S-transferase                                                                           |
| SPY1559                     | SpyM3_1269    | ccdA    |      | 1.67 | Cellular processes and signaling   | Posttranslational modification, protein turnover, chaperones | Cytochrome c biogenesis protein                                                                     |
| Spy2079                     | SpyM3_1770    | ahpC    |      | 1.68 | Cellular processes and signaling   | Posttranslational modification, protein turnover, chaperones | Peroxiredoxin                                                                                       |
| Spy1196                     | SpyM3_0839    | -       |      | 0.54 | Information storage and processing | Replication, recombination and repair                        |                                                                                                     |
| Spy1785                     | SpyM3_1551    | recG    |      | 1.81 | Information storage and processing | Replication, recombination and repair                        | RecG-like helicase                                                                                  |
| Spy0471                     | SpyM3_0333    | phoH    |      | 1.47 | Cellular processes and signaling   | Signal transduction mechanisms                               | Phosphate starvation-inducible protein PhoH, predicted ATPase                                       |
| Spy0216                     | SpyM3_0157    | -       |      | 0.58 | Information storage and processing | Transcription                                                | Transcriptional regulator                                                                           |
| Spy0300                     | SpyM3_0220    | comX1.1 | 0.03 | 0.04 | Information storage and processing | Transcription                                                | Competence-specific factor                                                                          |

Table S1. Cont.

|         |            |      |      |      |                                    |                                                 |                                                                                                  |
|---------|------------|------|------|------|------------------------------------|-------------------------------------------------|--------------------------------------------------------------------------------------------------|
| Spy0450 | SpyM3_0317 | mtsR | 0.00 | 0.01 | Information storage and processing | Transcription                                   | Mn-dependent transcriptional regulator                                                           |
| Spy0531 | SpyM3_0375 | acpA |      | 1.47 | Information storage and processing | Transcription                                   | dsRNA-specific ribonuclease                                                                      |
| Spy0830 | SpyM3_0558 | pyrR |      | 0.58 | Information storage and processing | Transcription                                   | putative transcriptional regulator                                                               |
| Spy2172 | SpyM3_1828 |      |      | 2.28 | Information storage and processing | Transcription                                   | Predicted transcriptional regulators                                                             |
| Spy0250 | SpyM3_0178 | rpmH |      | 0.39 | Information storage and processing | Translation, ribosomal structure and biogenesis |                                                                                                  |
| Spy0902 | SpyM3_0618 | amiC |      | 0.64 | Information storage and processing | Translation, ribosomal structure and biogenesis | Asp-tRNA <sup>Asn</sup> /Glu-tRNA <sup>Gln</sup> amidotransferase A subunit and related amidases |
| Spy1232 | SpyM3_0870 |      |      | 0.54 | Information storage and processing | Translation, ribosomal structure and biogenesis | 16S RNA G1207 methylase RsmC                                                                     |
| Spy1689 | SpyM3_1472 | glyQ |      | 1.64 | Information storage and processing | Translation, ribosomal structure and biogenesis | Glycyl-tRNA synthetase, alpha subunit                                                            |
| Spy1888 | SpyM3_1629 | rpmB |      | 0.65 | Information storage and processing | Translation, ribosomal structure and biogenesis | Ribosomal protein L28                                                                            |
| Spy0303 | SpyM3_0221 | -    | 0.18 |      | Mobile genetic element             | Transposase                                     |                                                                                                  |
| Spy0116 | SpyM3_1015 |      | 6.61 |      | Mobile genetic element             | Transposase                                     |                                                                                                  |
| SPy0303 | SpyM3_1704 | -    | 0.20 | 0.57 | Mobile genetic element             | Transposase                                     |                                                                                                  |
| Spy1159 | SpyM3_0815 | -    | 0.63 |      | Virulence                          | Virulence                                       | Predicted membrane protein, hemolysin III homolog                                                |
| SPY2037 | SpyM3_1740 | prsA | 1.81 |      | Virulence                          | Virulence                                       | Protein export protein prsA precursor                                                            |

Table S2. Primers and probes used in analysis

| Primer            | Sequence                       | Application                                                          |
|-------------------|--------------------------------|----------------------------------------------------------------------|
| mtsR-F1P1         | AACTGCAGCTTTGCAATCAATTGTTGGC   | Upstream fragment of <i>mtsR</i> for <i>mtsR</i> deletion            |
| mtsR-F1P2         | GAAGATCTGTAATCTTCTTTATTAGCGTC  |                                                                      |
| mtsR-F2P1         | CGGGATCCGGCGACAAGGAAGTGTGATC   | Downstream fragment of <i>mtsR</i> for <i>mtsR</i> deletion          |
| mtsR-F2P2         | AGTGTGCGACTTCGGCCAGACATTAATGAC |                                                                      |
| mtsRcomp-F        | GTGCCAGTTGACGAACAAGC           | Ligation of <i>mtsR</i> gene into pTOPO; sequencing of <i>mtsR</i>   |
| mtsRcomp-R        | GCCACACGGAGGGACTATT            |                                                                      |
| mtsR-seqF         | CGGCTACCAAGATGACCTAG           | Sequencing and PCR confirmation of <i>mtsR</i>                       |
| mtsR-seqR         | CGTGATGGTGTGAGAGTTGT           |                                                                      |
| mtsR-F-taqM3_317  | GCCACACGGAGGGACTAT             | TaqMan analysis of <i>mtsR</i> gene expression                       |
| mtsR-R-taqM3_317  | GATGGTGTGAGAGTTGTAGTGTTCA      |                                                                      |
| mtsR-P-taqM3_317  | CCTCGCTATGGTCAGCCTCTGTGCGA     |                                                                      |
| prsA-D            | GGTATAGTCAGATTGGGTAG           | Ligation of <i>prsA</i> gene into pTOPO                              |
| prsA-E            | GGTCATCAACGCCTACTAATG          |                                                                      |
| pDC123-seq1       | CCTTATTAACATTCAAC              | Sequencing and PCR confirmation of <i>mtsR</i> and <i>prsA</i>       |
| pDC123-seq2       | ATTCCCATGCCATCTCCAATC          |                                                                      |
| prsA-tmF          | TGGTAACGCTGGCGACAGT            | TaqMan analysis of <i>prsA</i> gene expression                       |
| prsA-tmR          | CGAGGTTGGTGTGTTGTGTGA          |                                                                      |
| prsA-tmP          | TGACCTTATCAGCTTGTG             |                                                                      |
| speB-5'           | TGCCTACAACAGCACTTTGG           | TaqMan analysis of <i>speB</i> gene expression                       |
| speB-3;           | GTGGGTCTCTGACGGCTTCT           |                                                                      |
| speB-probe        | GCCTGCGCCGCCACCAAGTA           |                                                                      |
| gyrA F taq M3_810 | CGCTGTCAAGATGGTAATGGAA         | TaqMan analysis of <i>gyrA</i> (endogenous in vitro) gene expression |
| gyrA R taq M3_810 | CCTGAGCGCCCCATAACA             |                                                                      |
| gyrA P taq M3_810 | TCCCTGGACCTGACTTCCGACTGG       |                                                                      |
